# Supplementary material
Source: PubMed Central journal article supplement (PMC4775109)
Supplement: supp_pp.15.01232_PP2015-01232R2_Supplemental_Materialmethods.pdf [file supp_pp.15.01232_PP2015-01232R2_Supplemental_Materialmethods.pdf]

## 1 **Supplemental Methods**

2

### 3 **Phylogenetic Analysis**

4     Alignments were generated using ClustalW2 (Larkin *et al.*, 2007) and then  
5 manually optimized. Gap regions were eliminated before phylogenetic analysis. The  
6 dendrogram was generated by a neighbor-joining method (*p*-distance model) with  
7 1,000 bootstrap replicates using MEGA software version 6.0 (alignments are given  
8 in Supplemental Table S5). Any gaps or missing data were treated using pairwise  
9 deletion method. Glycogen synthases (GS) from *Saccharomyces cerevisiae* (Sc  
10 GS) were used as an outgroup because eukaryotic glycogen synthases are  
11 classified as a different family than starch synthases and prokaryotic glycogen  
12 synthases in the CAZy database (Cantarel *et al.*, 2007) due to structural and  
13 mechanical differences.

14     The GenBank accession numbers for SS and GS genes are: AtSSI, NP\_197818;  
15 OsSSI, BAA03739.1; OtSS1, AAS88892; ZmSSI, AAB99957; AtSSII, AAF26156;  
16 OsSSIIa, BAD90591; OsSSIIb, AAK81729; OsSSIIc, AAK64284; OtSS2,  
17 AAS88880; ZmSSIIa, AAD13341; ZmSSIIb, AAD13342; AtSSIII, AAD30251;  
18 OsSSIIIa, AAM49811; OsSSIIIb, AAL40942; OtSS3a, AAS88893; OtSS3b,  
19 AAS88894; OtSS3c, AAS88881; ZmSSIII, AAC14014; AtSSIV, CAB78826;  
20 OsSSIVa, AAM49812; OsSSIVb, AAM49813; Nos GSa, BAB77555; Syn  
21 6803sII1393, BAL30964; AtSS6, AAK91459; OsSSV, ACC78131; ZmSSV,  
22 ACC78132; AtGBSSI, AAN31102; OsGBSSI, CAA44065; OsGBSSII, BAC21549;

23 OtGBSSI, AAS88890; ZmGBSSI, CAA27574; ZmGBSSII, ABA33603; Nos  
24 GSalr1879, BAB73578; CpUWE2, CAF24320; Syn 6803sII 0945, BAL29800;  
25 EcGS, AAA23870; ScGS; AAA88715.

26

### 27 ***Tos17* Mutagenesis and Screening for *ss4b* Lines by PCR**

28 Mutagenesis with *Tos17* and pool sampling were performed as described  
29 previously (Hirochika, 2001; Kumar and Hirochika, 2001). To screen for *ss4b*, DNA  
30 fragments carrying the *Tos17* transposon were prepared from DNA pools  
31 constructed using the three-dimensional sampling method from approximately  
32 40,000 *Tos17*-containing plants. These DNA fragments were subjected to PCR with  
33 transposon-specific primers and *OsSSIVb*-specific primers (see Supplemental  
34 Figure S2B).

35

### 36 **Analysis of Endosperm Starch Crystallinity**

37 X-ray diffraction analysis of endosperm starch crystallinity was performed as  
38 described previously (Fujita et al., 2003, 2006, 2007).

39

### 40 **Seed Lipid Composition and Levels**

41 Metabolite profiling using gas-chromatography-time-of-flight-mass spectrometry  
42 (GC-TOF-MS) was performed as described in Kusano et al. (2007) with minor  
43 modifications. Briefly, 100 healthy kernels of wild-type (cv. Nipponbare) and double  
44 mutant (*ss3a ss4b*, #2012) rice were selected and then the husks were separated

45 from the kernels. The brown rice grains were polished to obtain bran powder and  
46 the polished rice residue. After crushing the polished rice, we prepared three  
47 analytical replicates of bran (10 mg fresh weight) and polished rice powder (50 mg  
48 fresh weight) for GC-MS and LC-MS analysis, respectively. Bran powder and  
49 polished rice powder was extracted with extraction solvent  
50 [methanol/chloroform/water (3:1:1, v/v/v)] at a concentration of 10 mg/ml for bran  
51 extraction and 100 mg/ml for polished rice extraction. The extraction solvent  
52 contained 10 stable isotope reference compounds. After centrifugation, a 50 µl  
53 aliquot of the bran supernatant and a 200 µl aliquot of the polished rice supernatant  
54 was used for further analysis. We used *N*-methyl-*N*-trimethylsilyl trifluoroacetamide  
55 (MSTFA) for trimethylsilylation (Tokyo Chemical Industry, Tokyo, Japan) and the  
56 Rxi-5 Sil MS column (30 mm × 0.25 mm inner diameter fused-silica capillary column  
57 with a chemically bound 0.25 µl film) for this analysis. Raw data were exported,  
58 normalized, and then concatenated using CCMN and MetMask as described in  
59 Redestig et al. (2011). We used R v2.14.2 (64 bit) to conduct CCMN and LIMMA for  
60 metabolite profiling analysis.

61

## 62 **Protein Extraction from Developing Endosperm for Estimation of GBSSI** 63 **Protein**

64 Mature rice endosperm was extracted as described by Fujita et al. (2006). Total  
65 proteins were prepared by combining the soluble, loosely bound, and tightly bound  
66 proteins. The protein extracts were subjected to immunoblot analysis with rice

67 GBSSI antibody (Fujita et al., 2006). Densitometric analysis of immunoreactive  
68 bands was performed using NHI ImageJ 1.44 software to assess GBSSI protein  
69 levels.

70

## 71 **Preparation of Total Protein Extracts and Immunoblotting of Developing** 72 **Seeds at Intermediate Stages**

73 Frozen seeds (12 DAF) from wild-type Nipponbare and mutant lines were ground  
74 in 300  $\mu$ L of sample buffer (0.125 M Tris·HCl, pH 6.8, 8 M urea, 4% SDS, 5%  
75 2-mercaptoethanol) per seed with a plastic pestle. Samples were extracted  
76 overnight at room temperature (28°C) on a rotating platform and centrifuged at  
77 20,000  $\times g$  at room temperature for 5 min to remove starch. The supernatants (200  
78  $\mu$ L) were supplemented with 100  $\mu$ L of 0.1 M Tris·HCl, pH 6.8, 10% SDS, 12%  
79 2-mercaptoethanol, 20% glycerol, and 0.2% bromophenol blue, and stored at  
80  $-30^{\circ}\text{C}$ . Proteins were extracted from seeds at 7 DAF as described by Yun et al.  
81 (2011) with the following modifications. Four hulled seeds were weighed  
82 immediately after harvest and ground with a mortar and pestle in 50 mM Tris·HCl  
83 (pH 6.8), 8 M urea, 4% (w/v) SDS, 5% (v/v) 2-mercaptoethanol, 20 % (v/v) glycerol,  
84 and 0.1% (w/v) bromophenol blue (35  $\mu$ L/mg). The extracts were vigorously mixed  
85 for 30 min at room temperature and centrifuged at 10,000  $\times g$  for 3 min at room  
86 temperature, and the supernatants were stored at  $-20^{\circ}\text{C}$ .

87 Protein extracts (15  $\mu$ L for 12 DAF; 7  $\mu$ L for 7 DAF) were separated in 7.5% (w/v)  
88 or 4% to 20% (w/v), respectively, gradient gels (Bio-Rad). Proteins were transferred

89 onto PVDF membranes (Millipore or Bio-Rad). The membranes were probed with  
90 antibodies against recombinant SSIVb, FtsZ1, FtsZ2-1, MinD, MinE, and ISA3 as  
91 described previously (Yun and Kawagoe, 2010; Yun et al., 2011) or an antibody  
92 against SSIVa. Goat anti-rat antibodies conjugated with horseradish peroxidase  
93 (Bio-Rad or KPL) were used for chemiluminescence assays.

94

### 95 **Generation of a Polyclonal Antibody against SSIVa**

96 The DNA fragment encoding A703–T975 of rice SSIVa was amplified by PCR  
97 using the full-length cDNA (AK100976) as template and the primers  
98 5'-ATACCATGGCTTTAGAAGTGCGCTCA-3' and  
99 5'-TATCTCGAGTGTTTGAGCCGCTCCCCT-3'. The PCR product was cloned into  
100 pET23d (Novagen). The polypeptide was expressed in *E. coli* Rosetta2 (DE3),  
101 purified from inclusion bodies by Ni-NTA Sepharose (Qiagen), and injected into a rat  
102 for antibody production. The serum was used for western blotting.

103

### 104 **Cloning and Expression of OsSSIVb in *E. coli***

105 The full-length cDNA of OsSSIVb was amplified by PCR with the primers  
106 5'-CAGCCTCCGCATCCGATTCC-3' and  
107 5'-TGTGGCATCAGCGGCCGCGTCAGAGAAAG-3'. The PCR product was  
108 digested with *Nco*I and *Not*I, and cloned into the same sites of *pET30c* to add an  
109 N-terminal histidine tag. The construct was confirmed by DNA sequencing. The  
110 control plasmid was then prepared from this construct by digestion with *Sal*I and

111 *Xho*I, and self-ligated to remove the catalytic domain. These plasmids were  
112 expressed in *E. coli* BL21 (DE3) containing the pKJE7 chaperone plasmid. Soluble  
113 SSIVb proteins were bound to Ni-NTA Sepharose (Qiagen) in a buffer containing  
114 50 mM Tris·HCl (pH 8.0), 0.3 M NaCl, 20 mM imidazole, 10 mM 2-mercaptoethanol,  
115 and 10% glycerol; washed with 50 mM Tris·HCl (pH 8.0), 0.3 M NaCl, 30 mM  
116 imidazole, 10 mM 2-mercaptoethanol, and 10% glycerol; and eluted in 50 mM  
117 Tris·HCl (pH 8.0), 0.3 M NaCl, 250 mM imidazole, and 10 mM 2-mercaptoethanol.  
118 The eluate was concentrated using Amicon Ultra (30-kDa cutoff).

119

#### 120 **OsSSIVb Activity Staining**

121 Approximately 100 ng of purified recombinant protein or 10  $\mu$ L of rice extract was  
122 loaded on a 7.5% (w/v) native PAGE gel with or without 0.05% potato amylopectin  
123 (Sigma) as a primer for glucan synthesis. Gels were incubated in reaction buffer  
124 containing 0.5 M citrate and 1 mM ADP-glucose overnight at 30°C, and stained with  
125 solution containing 1% I<sub>2</sub> and 0.1% KI (Nishi et al., 2001).

126

#### 127 **Generation of a Polyclonal Antibody against SSIVb**

128 Ni-NTA (Qiagen) purified and C-terminus truncated rice SSIVb was prepared as  
129 described above, and then subjected to SDS-PAGE followed by Coomassie Brilliant  
130 Blue staining. The SSIVb protein band was excised and electro-eluted (Bio-Rad).  
131 The eluted proteins were injected into a rabbit for antibody generation. The serum  
132 was used for immuno-electron microscopy analysis.

133

134

135 **References for Supplemental Data**

136 **Cantarel, B.L., Coutinho, P.M., Rancurel, C., Bernard, T., Lombard, V., and**

137 **Henrissat, B.** (2009) The Carbohydrate-Active EnZymes database (CAZy):

138 an expert resource for Glycogenomics. *Nucleic Acids Res* **37**:D233-238

139 **Fujita, N., Kubo, A., Suh, D.S., Wong, K.S., Jane, J.L., Ozawa, K., Takaiwa, F.,**

140 **Inaba, Y., and Nakamura, Y.** (2003). Antisense inhibition of isoamylase

141 alters the structure of amylopectin and the physicochemical properties of

142 starch in rice endosperm. *Plant Cell Physiol.* **44**: 607–618.

143 **Fujita, N., Yoshida, M., Asakura, N., Ohdan, T., Miyao, A., Hirochika, H.,**

144 **Nakamura, and Y.** (2006). Function and characterization of starch synthase

145 I using mutants in rice. *Plant Physiol.* **140**: 1070–1084.

146 **Fujita, N., Yoshida, M., Kondo, T., Saito, K., Utsumi, Y., Tokunaga, T., Nishi, A.,**

147 **Satoh, H., Park, J.H., Jane, J.L., Miyao, A., Hirochika, H., and**

148 **Nakamura, Y.** (2007). Characterization of SSIIIa-deficient mutants of rice:

149 The function of SSIIIa and pleiotropic effects by SSIIIa deficiency in the rice

150 endosperm. *Plant Physiol.* **144**: 2009–2023.

151 **Hirochika, H.** (2001). Contribution of the *Tos17* retrotransposon to rice functional

152 genomics. *Curr. Opin. Plant. Biol.* **4**: 118– 122.

153 **Kimbara, J., Yoshida, M., Ito, H., Kitagawa, M., Takada, W., Hayashi, K.,**

154 **Shibutani, Y., Kusano, M., Okazaki, Y., Nakabayashi, R., Mori, T., Saito,**

155 **K., Ariizumi, T. and Ezura, H.** (2013) Inhibition of *CUTIN DEFICIENT 2*  
156 causes defects in cuticle function and structure and metabolite changes in  
157 tomato fruit. *Plant Cell Physiol.*, **54**, 1535–1548.

158 **Kumar, A., and Hirochika, H.** (2001). Applications of retrotransposons as genetic  
159 tools in plant biology. *Trends Plant Sci.* **6**: 127– 134.

160 **Kusano, M., Fukushima, A., Kobayashi, M., Hayashi, N., Jonsson, P., Moritz, T.,**  
161 **Ebana, K., Saito, K.** (2007). Application of a metabolomic method  
162 combining one-dimensional and two-dimensional gas  
163 chromatography-time-of-flight/mass spectrometry to metabolic phenotyping  
164 of natural variants in rice. *J Chromatogr B Analyt Technol Biomed Life Sci*  
165 **855**: 71– 79.

166 **Larkin, M.A., Blackshields, G., Brown, N.P., Chenna, R., McGettigan, P.A.,**  
167 **McWilliam, H., Valentin, F., Wallace, I.M., Wilm, A., Lopez, R.,**  
168 **Thompson, J.D., Gibson, T.J., and Higgins, D.G.** (2007) Clustal W and  
169 Clustal X version 2.0. *Bioinformatics* **23**: 2947-2948.

170 **Nishi, A., Nakamura, Y., Tanaka, N., and Satoh, H.** (2001). Biochemical and  
171 genetic analysis of the effects of *amylose-extender* mutation in rice  
172 endosperm. *Plant Physiol.* **127**: 459– 472.

173 **Redestig, H., Kusano, M., Ebana, K., Kobayashi, M., Oikawa, A., Okazaki, Y.,**  
174 **Matsuda, F., Arita, M., Fujita, N., Saito, K.** (2011). Exploring molecular  
175 backgrounds of quality traits in rice by predictive models based on  
176 high-coverage metabolomics. *BMC Syst Biol* **5**: 176.



177 **Yun, M.S., and Kawagoe, Y.** (2010). Septum formation in amyloplasts produces  
178 compound granules in the rice endosperm and is regulated by plastid  
179 division proteins. *Plant Cell Physiol.* **51**: 1469–1479.

180 **Yun, M.S., Umemoto, T., and Kawagoe, Y.** (2011). Rice debranching enzyme  
181 isoamylase3 facilitates starch metabolism and affects plastid  
182 morphogenesis. *Plant Cell Physiol.* **52**: 1068–1082.

183
