# Supplementary material
Source: PubMed Central journal article supplement (PMC4775109)
Supplement: supp_pp.15.01232_PP2015-01232R2_Supplemental_Materialtbls.pdf [file supp_pp.15.01232_PP2015-01232R2_Supplemental_Materialtbls.pdf]

- 1 **Supplemental Table S1.** Segregation of F<sub>2</sub> seeds derived from a cross between *ss3a*  
2 and *ss4b* mutants according to normal, white core, and opaque morphologies.
- 3 **Supplemental Table S2.** Log<sub>2</sub>-fold changes in the lipid profiles of bran and polished  
4 rice grains from wild-type (Nipponbare) and *ss3a ss4b* (#2012).
- 5 **Supplemental Table S3.** Percentage of amyloplasts exposing inner starch granules  
6 when rice grains were cracked with a knife.
- 7 **Supplemental Table S4.** Composition of carbohydrate content (weight %) in  
8 endosperm starch fractions separated by gel filtration chromatography (Toyopearl  
9 HW55S/HW50S ×3).
- 10 **Supplemental Table S5.** Amino acid alignment used for phylogenetic analysis of starch  
11 synthases (SSs) and glycogen synthases (GSs).  
12

13

14 **Supplemental Tables**

15

**Supplemental Table S1.** Segregation of F<sub>2</sub> seeds derived from a cross between *ss3a* and *ss4b* mutants according to normal, white core, and opaque morphologies.

| Cross combination |   |                   | F <sub>1</sub> | Segregation in F <sub>2</sub> |            |        |       |                     |
|-------------------|---|-------------------|----------------|-------------------------------|------------|--------|-------|---------------------|
| (♀)               | × | (♂)               |                | Translucent                   | White core | Opaque | Total | $\chi^2_{(12:3:1)}$ |
| <i>e1 (ss3a)</i>  | × | <i>e8 (ss4b)</i>  | Translucent    | 140                           | 29         | 10     | 179   | 0.99*               |
| <i>e1 (ss3a)</i>  | × | <i>e14 (ss4b)</i> | Translucent    | 113                           | 30         | 11     | 154   | 0.29*               |

\*Significant at 0.1 % level.

16

17

18

19

20

21

22

23

24

25

26

27

**Supplemental Table 2.** Log<sub>2</sub>-fold changes in the lipid profiles of bran and polished rice grains from wild-type (Nipponbare) and *ss3a ss4b* (#2012).

| Id  | Annotation level | Synonym                           | Line no   | Bran                                          |                     | Polished rice grains                          |                     |
|-----|------------------|-----------------------------------|-----------|-----------------------------------------------|---------------------|-----------------------------------------------|---------------------|
|     |                  |                                   |           | Log <sub>2</sub> -fold change (#2012 vs. Nip) | FDR (#2012 vs. Nip) | Log <sub>2</sub> -fold change (#2012 vs. Nip) | FDR (#2012 vs. Nip) |
| 100 | A                | lysoPC_16:0 ([M+H] <sup>+</sup> ) | LIPID_88  | -0.16                                         | 0.5286              | 1.59                                          | 0.0000              |
| 103 | A                | lysoPC_18:0 ([M+H] <sup>+</sup> ) | LIPID_112 | 0.54                                          | <b>0.0062</b>       | 2.60                                          | 0.0000              |
| 104 | A                | lysoPC_18:1 ([M+H] <sup>+</sup> ) | LIPID_113 | 0.12                                          | 0.5261              | 1.68                                          | 0.0000              |
| 105 | A                | lysoPC_18:2 ([M+H] <sup>+</sup> ) | LIPID_114 | -0.09                                         | 0.7604              | 0.57                                          | 0.0295              |
| 109 | A                | DAG_34:1 ([M+NH4] <sup>+</sup> )  | LIPID_169 | ND                                            | ND                  | ND                                            | ND                  |
| 110 | A                | DAG_34:2 ([M+NH4] <sup>+</sup> )  | LIPID_170 | ND                                            | ND                  | ND                                            | ND                  |
| 111 | A                | DAG_34:3 ([M+NH4] <sup>+</sup> )  | LIPID_171 | ND                                            | ND                  | ND                                            | ND                  |
| 113 | A                | DAG_36:2 ([M+NH4] <sup>+</sup> )  | LIPID_182 | ND                                            | ND                  | ND                                            | ND                  |
| 114 | A                | DAG_36:3 ([M+NH4] <sup>+</sup> )  | LIPID_184 | -0.75                                         | <b>0.0011</b>       | 2.39                                          | 0.0000              |
| 115 | A                | DAG_36:4 ([M+NH4] <sup>+</sup> )  | LIPID_187 | ND                                            | ND                  | ND                                            | ND                  |
| 116 | A                | DAG_36:5 ([M+NH4] <sup>+</sup> )  | LIPID_189 | -0.61                                         | <b>0.0422</b>       | 2.74                                          | 0.0000              |
| 117 | A                | DAG_36:6 ([M+NH4] <sup>+</sup> )  | LIPID_190 | -0.42                                         | 0.4153              | 2.63                                          | 0.0037              |
| 118 | A                | DAG_36:1 ([M+NH4] <sup>+</sup> )  | LIPID_212 | ND                                            | ND                  | ND                                            | ND                  |
| 119 | A                | PE_34:2 ([M+H] <sup>+</sup> )     | LIPID_214 | -1.46                                         | <b>0.0002</b>       | 1.97                                          | 0.0000              |
| 120 | A                | PE_34:3 ([M+H] <sup>+</sup> )     | LIPID_215 | -0.24                                         | 0.5843              | -0.17                                         | 0.5879              |
| 122 | A                | PE_36:6 ([M+H] <sup>+</sup> )     | LIPID_231 | -0.50                                         | 0.8246              | -2.91                                         | 0.1189              |
| 123 | A                | PE_34:1 ([M+H] <sup>+</sup> )     | LIPID_243 | -1.55                                         | <b>0.0001</b>       | 2.11                                          | 0.0000              |
| 125 | A                | PC_34:6 ([M+H] <sup>+</sup> )     | LIPID_246 | ND                                            | ND                  | ND                                            | ND                  |
| 126 | A                | PE_36:2 ([M+H] <sup>+</sup> )     | LIPID_253 | ND                                            | ND                  | ND                                            | ND                  |
| 127 | A                | PE_36:3 ([M+H] <sup>+</sup> )     | LIPID_257 | ND                                            | ND                  | ND                                            | ND                  |
| 128 | A                | PE_36:4 ([M+H] <sup>+</sup> )     | LIPID_259 | -1.20                                         | <b>0.0002</b>       | 2.17                                          | 0.0000              |
| 129 | A                | PE_36:5 ([M+H] <sup>+</sup> )     | LIPID_260 | 0.11                                          | 0.6969              | 0.27                                          | 0.2983              |
| 130 | A                | PG_34:1 ([M+NH4] <sup>+</sup> )   | LIPID_262 | -1.01                                         | <b>0.0420</b>       | 2.02                                          | 0.0020              |
| 131 | A                | MGDG_34:5 ([M+NH4] <sup>+</sup> ) | LIPID_263 | ND                                            | ND                  | ND                                            | ND                  |
| 132 | A                | PG_34:2 ([M+NH4] <sup>+</sup> )   | LIPID_264 | -1.28                                         | <b>0.0247</b>       | 1.71                                          | 0.0029              |
| 133 | A                | MGDG_34:6 ([M+NH4] <sup>+</sup> ) | LIPID_265 | 0.06                                          | 0.9535              | -1.19                                         | 0.1072              |
| 134 | A                | PG_34:3 ([M+NH4] <sup>+</sup> )   | LIPID_266 | ND                                            | ND                  | ND                                            | ND                  |
| 135 | A                | PC_34:1 ([M+H] <sup>+</sup> )     | LIPID_268 | -1.66                                         | <b>0.0000</b>       | 1.78                                          | 0.0000              |
| 136 | A                | PG_34:4 ([M+NH4] <sup>+</sup> )   | LIPID_269 | 1.05                                          | 0.1171              | -0.94                                         | 0.0913              |
| 137 | A                | PC_34:2 ([M+H] <sup>+</sup> )     | LIPID_270 | -1.58                                         | <b>0.0001</b>       | 1.81                                          | 0.0000              |
| 138 | A                | PC_34:3 ([M+H] <sup>+</sup> )     | LIPID_273 | -0.92                                         | <b>0.0059</b>       | 1.14                                          | 0.0010              |
| 139 | A                | PC_34:4 ([M+H] <sup>+</sup> )     | LIPID_274 | ND                                            | ND                  | ND                                            | ND                  |
| 140 | A                | PC_34:5 ([M+H] <sup>+</sup> )     | LIPID_276 | ND                                            | ND                  | ND                                            | ND                  |
| 141 | A                | PC_36:6 ([M+H] <sup>+</sup> )     | LIPID_279 | -0.55                                         | 0.1382              | -0.69                                         | 0.0504              |
| 142 | A                | MGDG_34:1 ([M+NH4] <sup>+</sup> ) | LIPID_282 | ND                                            | ND                  | ND                                            | ND                  |
| 143 | A                | MGDG_34:2 ([M+NH4] <sup>+</sup> ) | LIPID_284 | ND                                            | ND                  | ND                                            | ND                  |
| 144 | A                | MGDG_34:3 ([M+NH4] <sup>+</sup> ) | LIPID_286 | ND                                            | ND                  | ND                                            | ND                  |
| 146 | A                | MGDG_34:4 ([M+NH4] <sup>+</sup> ) | LIPID_290 | ND                                            | ND                  | ND                                            | ND                  |
| 148 | A                | MGDG_36:6 ([M+NH4] <sup>+</sup> ) | LIPID_294 | -1.71                                         | <b>0.0015</b>       | 0.11                                          | 0.8132              |
| 149 | A                | PC_36:1 ([M+H] <sup>+</sup> )     | LIPID_296 | -1.48                                         | <b>0.0001</b>       | 1.85                                          | 0.0000              |
| 150 | A                | PC_36:2 ([M+H] <sup>+</sup> )     | LIPID_297 | -1.69                                         | <b>0.0000</b>       | 1.44                                          | 0.0000              |
| 151 | A                | PC_36:3 ([M+H] <sup>+</sup> )     | LIPID_300 | -1.60                                         | <b>0.0000</b>       | 1.65                                          | 0.0000              |
| 152 | A                | PC_36:4 ([M+H] <sup>+</sup> )     | LIPID_304 | -1.51                                         | <b>0.0000</b>       | 1.74                                          | 0.0000              |
| 153 | A                | PC_36:5 ([M+H] <sup>+</sup> )     | LIPID_306 | -1.52                                         | 0.1640              | 1.01                                          | 0.1940              |
| 154 | A                | MGDG_36:4 ([M+NH4] <sup>+</sup> ) | LIPID_324 | -2.21                                         | <b>0.0031</b>       | 1.91                                          | 0.0112              |
| 155 | A                | MGDG_36:5 ([M+NH4] <sup>+</sup> ) | LIPID_325 | -1.92                                         | <b>0.0247</b>       | 1.28                                          | 0.0256              |
| 156 | A                | TAG_48:0 ([M+NH4] <sup>+</sup> )  | LIPID_327 | -1.12                                         | <b>0.0000</b>       | 2.51                                          | 0.0000              |

| Supplemental Table 2. Log <sub>2</sub> -fold changes in the lipid profiles of bran and polished rice grains from wild-type (Nipponbare) and <i>ss3a ss4b</i> (#2012). Continued. |                  |                     |           |                                               |                     |                                               |                     |  |
|----------------------------------------------------------------------------------------------------------------------------------------------------------------------------------|------------------|---------------------|-----------|-----------------------------------------------|---------------------|-----------------------------------------------|---------------------|--|
| Id                                                                                                                                                                               | Annotation level | Synonym             | Line no   | Bran                                          |                     | Polished rice grains                          |                     |  |
|                                                                                                                                                                                  |                  |                     |           | Log <sub>2</sub> -fold change (#2012 vs. Nip) | FDR (#2012 vs. Nip) | Log <sub>2</sub> -fold change (#2012 vs. Nip) | FDR (#2012 vs. Nip) |  |
| 157                                                                                                                                                                              | A                | TAG_48:1 (M+NH4+)   | LIPID_328 | -1.60                                         | 0.0000              | 2.30                                          | 0.0000              |  |
| 158                                                                                                                                                                              | A                | TAG_48:2 (M+NH4+)   | LIPID_329 | -2.09                                         | 0.0000              | 1.71                                          | 0.0000              |  |
| 161                                                                                                                                                                              | A                | PC_38:3 (M+H+)      | LIPID_337 | -1.94                                         | 0.0002              | 1.03                                          | 0.0092              |  |
| 162                                                                                                                                                                              | A                | SQDG_34:2 (M+NH4+)  | LIPID_345 | ND                                            | ND                  | ND                                            | ND                  |  |
| 163                                                                                                                                                                              | A                | SQDG_34:3 (M+NH4+)  | LIPID_347 | -0.52                                         | 0.7314              | -1.12                                         | 0.2649              |  |
| 166                                                                                                                                                                              | A                | PI_34:2 (M+NH4+)    | LIPID_362 | -1.35                                         | 0.0001              | 1.54                                          | 0.0000              |  |
| 167                                                                                                                                                                              | A                | TAG_50:1 (M+NH4+)   | LIPID_363 | -1.27                                         | 0.0000              | 2.82                                          | 0.0000              |  |
| 168                                                                                                                                                                              | A                | PI_34:3 (M+NH4+)    | LIPID_365 | -0.28                                         | 0.5574              | 0.12                                          | 0.8488              |  |
| 169                                                                                                                                                                              | A                | TAG_50:2 (M+NH4+)   | LIPID_367 | -1.41                                         | 0.0000              | 2.49                                          | 0.0000              |  |
| 170                                                                                                                                                                              | A                | TAG_50:3 (M+NH4+)   | LIPID_369 | ND                                            | ND                  | ND                                            | ND                  |  |
| 171                                                                                                                                                                              | A                | TAG_50:4 (M+NH4+)   | LIPID_370 | -2.12                                         | 0.0000              | 1.52                                          | 0.0000              |  |
| 172                                                                                                                                                                              | A                | SQDG_36:5 (M+NH4+)  | LIPID_385 | ND                                            | ND                  | ND                                            | ND                  |  |
| 174                                                                                                                                                                              | A                | SQDG_36:6 (M+NH4+)  | LIPID_388 | -0.72                                         | 0.5933              | 0.29                                          | 0.7831              |  |
| 176                                                                                                                                                                              | A                | TAG_52:1 (M+NH4+)   | LIPID_396 | -1.14                                         | 0.0000              | 2.89                                          | 0.0000              |  |
| 177                                                                                                                                                                              | A                | TAG_52:2 (M+NH4+)   | LIPID_398 | -1.01                                         | 0.0000              | 2.37                                          | 0.0000              |  |
| 178                                                                                                                                                                              | A                | TAG_52:3 (M+NH4+)   | LIPID_400 | -0.90                                         | 0.0000              | 2.24                                          | 0.0000              |  |
| 179                                                                                                                                                                              | A                | TAG_52:4 (M+NH4+)   | LIPID_401 | -1.25                                         | 0.0000              | 2.36                                          | 0.0000              |  |
| 181                                                                                                                                                                              | A                | TAG_52:5 (M+NH4+)   | LIPID_404 | -1.13                                         | 0.0000              | 3.40                                          | 0.0000              |  |
| 182                                                                                                                                                                              | A                | TAG_54:8 (M+NH4+)   | LIPID_406 | -0.87                                         | 0.0006              | 3.87                                          | 0.0000              |  |
| 183                                                                                                                                                                              | A                | TAG_54:9 (M+NH4+)   | LIPID_413 | ND                                            | ND                  | ND                                            | ND                  |  |
| 184                                                                                                                                                                              | A                | TAG_54:5 (M+NH4+)   | LIPID_424 | -0.90                                         | 0.0000              | 2.24                                          | 0.0000              |  |
| 185                                                                                                                                                                              | A                | TAG_54:6 (M+NH4+)   | LIPID_426 | -1.41                                         | 0.0000              | 2.55                                          | 0.0000              |  |
| 186                                                                                                                                                                              | A                | TAG_54:7 (M+NH4+)   | LIPID_429 | -1.17                                         | 0.0001              | 3.30                                          | 0.0000              |  |
| 189                                                                                                                                                                              | A                | TAG_54:1 (M+NH4+)   | LIPID_445 | -1.35                                         | 0.0000              | 2.46                                          | 0.0000              |  |
| 190                                                                                                                                                                              | A                | TAG_54:2 (M+NH4+)   | LIPID_449 | -1.14                                         | 0.0000              | 2.58                                          | 0.0000              |  |
| 191                                                                                                                                                                              | A                | TAG_54:3 (M+NH4+)   | LIPID_451 | -0.93                                         | 0.0000              | 2.23                                          | 0.0000              |  |
| 192                                                                                                                                                                              | A                | TAG_54:4 (M+NH4+)   | LIPID_453 | -0.77                                         | 0.0000              | 2.20                                          | 0.0000              |  |
| 193                                                                                                                                                                              | A                | DG DG_34:5 (M+NH4+) | LIPID_471 | ND                                            | ND                  | ND                                            | ND                  |  |
| 194                                                                                                                                                                              | A                | TAG_58:5 (M+NH4+)   | LIPID_472 | -1.73                                         | 0.0000              | 1.88                                          | 0.0000              |  |
| 195                                                                                                                                                                              | A                | DG DG_34:6 (M+NH4+) | LIPID_473 | ND                                            | ND                  | ND                                            | ND                  |  |
| 196                                                                                                                                                                              | A                | DG DG_34:1 (M+NH4+) | LIPID_488 | -0.30                                         | 0.3849              | 5.68                                          | 0.0000              |  |
| 197                                                                                                                                                                              | A                | DG DG_34:2 (M+NH4+) | LIPID_492 | 0.06                                          | 0.8701              | 4.73                                          | 0.0000              |  |
| 198                                                                                                                                                                              | A                | DG DG_34:3 (M+NH4+) | LIPID_496 | -0.68                                         | 0.0247              | 1.57                                          | 0.0003              |  |
| 199                                                                                                                                                                              | A                | DG DG_34:4 (M+NH4+) | LIPID_500 | ND                                            | ND                  | ND                                            | ND                  |  |
| 200                                                                                                                                                                              | A                | TAG_56:4 (M+NH4+)   | LIPID_501 | -1.37                                         | 0.0001              | 1.96                                          | 0.0000              |  |
| 201                                                                                                                                                                              | A                | DG DG_36:6 (M+NH4+) | LIPID_502 | -0.90                                         | 0.0018              | 0.71                                          | 0.0044              |  |
| 202                                                                                                                                                                              | A                | TAG_58:1 (M+NH4+)   | LIPID_520 | -1.64                                         | 0.0000              | 2.36                                          | 0.0000              |  |
| 203                                                                                                                                                                              | A                | DG DG_36:2 (M+NH4+) | LIPID_522 | ND                                            | ND                  | ND                                            | ND                  |  |
| 204                                                                                                                                                                              | A                | TAG_58:2 (M+NH4+)   | LIPID_524 | ND                                            | ND                  | ND                                            | ND                  |  |
| 205                                                                                                                                                                              | A                | DG DG_36:3 (M+NH4+) | LIPID_525 | ND                                            | ND                  | ND                                            | ND                  |  |
| 206                                                                                                                                                                              | A                | TAG_58:3 (M+NH4+)   | LIPID_527 | -1.50                                         | 0.0000              | 2.08                                          | 0.0000              |  |
| 207                                                                                                                                                                              | A                | DG DG_36:4 (M+NH4+) | LIPID_528 | ND                                            | ND                  | ND                                            | ND                  |  |
| 208                                                                                                                                                                              | A                | TAG_58:4 (M+NH4+)   | LIPID_530 | -1.65                                         | 0.0000              | 1.75                                          | 0.0000              |  |
| 209                                                                                                                                                                              | A                | DG DG_36:5 (M+NH4+) | LIPID_531 | ND                                            | ND                  | ND                                            | ND                  |  |
| 210                                                                                                                                                                              | A                | TAG_60:2 (M+NH4+)   | LIPID_540 | ND                                            | ND                  | ND                                            | ND                  |  |
| 211                                                                                                                                                                              | A                | TAG_60:3 (M+NH4+)   | LIPID_541 | -1.59                                         | 0.0000              | 1.86                                          | 0.0000              |  |
| 212                                                                                                                                                                              | A                | TAG_60:4 (M+NH4+)   | LIPID_542 | -1.84                                         | 0.0000              | 1.45                                          | 0.0000              |  |

*N*=3 (analytical replications of polished seed powder and bran from 100 grains).  
Identification/Annotation levels were determined according to Summuner et al. 2007. A, annotated (MSI-level 2).  
ND, not detected; FDR, false discovery rate; DAG, diacyl glycerol; DG DG, digalactosyldiacylglycerol;  
MG DG, monogalactosyldiacylglycerol; PC, phosphatidylcholine; PE, phosphatidylethanolamine;  
PG, phosphatidylglycerol; PI, phosphatidylinositol; SQ DG, sulfoquinovosyl diacylglycerol; TAG, triacylglycerol.  
Pink and Blue-shaded, |log<sub>2</sub>-fold change (#2012 vs. Nip)| ≤ 1 and FDR < 0.05.

30

31

32

**Supplemental Table S3. Percentage of amyloplasts exposing inner starch granules when rice grains were cracked with a knife.**

| Line       | Genotype         | % of amyloplasts exposing inner |
|------------|------------------|---------------------------------|
| Nipponbare | wild-type        | 38.1 <sup>a</sup>               |
| <i>e1</i>  | <i>ss3a</i>      | 5.9 <sup>a,e</sup>              |
| <i>e8</i>  | <i>ss4b</i>      | 42.0 <sup>b</sup>               |
| <i>e14</i> | <i>ss4b</i>      | 51.0 <sup>c</sup>               |
| #2012      | <i>ss3a/ss4b</i> | - <sup>d</sup>                  |
| #2013      | <i>ss3a/ss4b</i> | - <sup>d</sup>                  |

<sup>a</sup>N=9, The number of the photos of the seed sections.

<sup>b</sup>N=6

<sup>c</sup>N=3

<sup>d</sup>Amyloplast units were not observed.

<sup>e</sup>Significant differences between WT by *t*-test at  $P < 0.05$ .

33

34

35

36

37

38

**Supplemental Table S4.** Composition of carbohydrate content (weight %) in endosperm starch fractions separated by gel filtration chromatography (Toyopearl HW55S/HW50S x 3).

| Line                                                                                                                                                                                            |                          | Frac. I <sup>a</sup>      | Frac. II                  | Frac. III                 | TAC <sup>c</sup>          | III/II                   |
|-------------------------------------------------------------------------------------------------------------------------------------------------------------------------------------------------|--------------------------|---------------------------|---------------------------|---------------------------|---------------------------|--------------------------|
|                                                                                                                                                                                                 |                          | (%)                       | (%)                       | (%)                       | (%)                       |                          |
| WT                                                                                                                                                                                              | starch <sup>b</sup>      | 22.0±0.3 <sup>d, **</sup> | 20.0±0.2 <sup>**</sup>    | 58.0±0.2 <sup>**</sup>    | 20.8±0.3 <sup>**</sup>    | 2.9±0.1 <sup>**</sup>    |
| (Nipponbare)                                                                                                                                                                                    | amylopectin <sup>c</sup> | 1.2±0.1 <sup>c, **</sup>  | 21.2±0.5 <sup>**</sup>    | 57.6±0.4 <sup>**</sup>    |                           | 2.6±0.1 <sup>**</sup>    |
| <i>ss3a</i>                                                                                                                                                                                     | starch                   | 30.8±0.0 <sup>*</sup>     | 12.7±0.1 <sup>*</sup>     | 56.5±0.1 <sup>*</sup>     | 27.9±0.2 <sup>*</sup>     | 4.4±0.0 <sup>*</sup>     |
|                                                                                                                                                                                                 | amylopectin              | 2.9±0.2 <sup>*</sup>      | 12.3±0.2 <sup>*</sup>     | 54.8±0.3 <sup>*</sup>     |                           | 4.5±0.2 <sup>*</sup>     |
| <i>ss4b</i>                                                                                                                                                                                     | starch                   | 14.6±1.3 <sup>*, **</sup> | 22.5±0.5 <sup>*, **</sup> | 62.9±1.4 <sup>*, **</sup> | 13.1±1.2 <sup>**</sup>    | 2.8±0.1 <sup>**</sup>    |
| ( <i>e8</i> )                                                                                                                                                                                   | amylopectin              | 1.5±0.0 <sup>**</sup>     | 19.2±0.6 <sup>**</sup>    | 59.4±0.6 <sup>**</sup>    |                           | 3.1±0.2 <sup>*, **</sup> |
| <i>ss4b</i>                                                                                                                                                                                     | starch                   | 11.9±2.0 <sup>*, **</sup> | 23.4±0.1 <sup>*, **</sup> | 64.7±1.9 <sup>*, **</sup> | 10.5±1.9 <sup>*, **</sup> | 2.7±0.1 <sup>**</sup>    |
| ( <i>e14</i> )                                                                                                                                                                                  | amylopectin              | 1.4±0.0 <sup>**</sup>     | 20.4±0.2 <sup>**</sup>    | 61.1±0.2 <sup>*, **</sup> |                           | 3.0±0.1 <sup>*, **</sup> |
| <i>ss3a/ss4b</i>                                                                                                                                                                                | starch                   | 33.3±0.3 <sup>*, **</sup> | 11.4±0.1 <sup>*, **</sup> | 55.4±0.3 <sup>*, **</sup> | 30.3±0.3 <sup>*, **</sup> | 4.9±0.1 <sup>*, **</sup> |
| (#2012)                                                                                                                                                                                         | amylopectin              | 2.9±0.1 <sup>*</sup>      | 11.1±0.1 <sup>*, **</sup> | 56.0±0.1 <sup>**</sup>    |                           | 5.0±0.1 <sup>*</sup>     |
| <i>ss3a/ss4b</i>                                                                                                                                                                                | starch                   | 33.6±0.7 <sup>*</sup>     | 11.2±0.2 <sup>*, **</sup> | 55.2±0.9 <sup>*</sup>     | 29.8±0.6 <sup>*, **</sup> | 5.0±0.2 <sup>*, **</sup> |
| (#2013)                                                                                                                                                                                         | amylopectin              | 3.8±0.2 <sup>*, **</sup>  | 11.0±0.5 <sup>*</sup>     | 60.1±0.4 <sup>*, **</sup> |                           | 5.0±0.2 <sup>*</sup>     |
| <sup>a</sup> Three fractions (Fr. I, II and III) were divided at the valleys of the carbohydrate content curve equipped with refractive index detectors (Figure 2 and Supplemental Figure S3C). |                          |                           |                           |                           |                           |                          |
| <sup>b</sup> Total carbohydrate content was 100 %.                                                                                                                                              |                          |                           |                           |                           |                           |                          |
| <sup>c</sup> The amylopectin area for Fr. II and Fr. III were superimposed on those of starch, and the amount of the amylopectin Fr. I (extra-long chain) was calculated.                       |                          |                           |                           |                           |                           |                          |
| <sup>d</sup> Mean±SE of at least three replications.                                                                                                                                            |                          |                           |                           |                           |                           |                          |
| <sup>e</sup> True amylose content=apparent amylose content (Fr. I of starch) – extra-long chains (Fr. I of amylopectin).                                                                        |                          |                           |                           |                           |                           |                          |
| *Significant differences between WT and mutant lines by <i>t</i> -test at <i>P</i> <0.05.                                                                                                       |                          |                           |                           |                           |                           |                          |
| **Significant differences between <i>ss3a</i> and other lines by <i>t</i> -test at <i>P</i> <0.05.                                                                                              |                          |                           |                           |                           |                           |                          |

39

40

41

**Supplemental Table S5.** Amino acid alignment used for phylogenetic analysis of starch synthases (SSs) and glycogen synthases (GSs). Alignments were generated using ClustalW2 (Larkin *et al.*, 2007) and manually optimized. Gap regions were eliminated prior to phylogenetic analysis. Residues used for phylogenetic analysis are shown. Conserved residues among SSs and GSs, except for Sc GS, were indicated in colour as follows. Blue; 100% conservation, green; 80-99% conservation, yellow; 60-79% conservation, red; 40-59% conservation.

| Family          | Isozyme                                                        | Name                                                             | Position |
|-----------------|----------------------------------------------------------------|------------------------------------------------------------------|----------|
| SS7             | Os SS7                                                         | LHVVHICSEMDPIITRRQSLATYVTLSSALQKGNLVEVILPKRYVYHFAFADVESEYHKNRIW  | 222-297  |
|                 | Sm SS7                                                         | LHVVHICSEMTPYASCQPLSAYVASLSCSICQKKNLVEVILPKRYGSIHGADEVESEYHKNKIW | 229-298  |
|                 | Rt SS6                                                         | LHVVHICSEMAPLVSVFLASITITLSCALQEEGIMVEVILPKRYEIEGADAVSYHANNRIW    | 191-266  |
|                 | Os SS881i                                                      | MTITFIATECHKPMCKTGGIGDVLGGLPFAARAKMGRVMTIAPRYQYKDDLVVEVNETVRF    | 81-151   |
|                 | Sm SS881i                                                      | MTIVFVATEVHPWCKTGGIGDVGGLPFAIARMGHRVMTIAPRYQYKDDLVVEVNETVRF      | 81-151   |
|                 | Rt SS881                                                       | MSVIFIGAEVGPMSKIGGIGDVLGGLPFAIARMGHRVMTIAPRYQYKDDAVQIKENVRFF     | 83-154   |
|                 | Os SS881                                                       | MNVFVGAEMAPMSKIGGIGDVLGGLPFAIARMGHRVMTIAPRYQYKDDVVAEIKERVRFF     | 83-153   |
|                 | Sm SS881                                                       | MNVFVGAEMAPMSKIGGIGDVLGGLPFAIARMGHRVMTIAPRYQYKDDVVAEIKETVRFF     | 77-147   |
|                 | Os SS881                                                       | MKIVFVSAECSPPMSKIGGIGDVGSLPFAIARMGHRVMTIAPRYQYAGVHVEAIKSVGF      | 41-107   |
|                 | Os SS1                                                         | RSVFVTGEASPYAKSGGIGDVCGLPFAIARMGHRVMTIAPRYNFANKKHIKIPHEVTF       | 139-209  |
|                 | Sm SS1                                                         | QSVFVTGEASPYAKSGGIGDVCGLPFAIARMGHRVMTIAPRYNFANKKHIRIPHEVTF       | 132-208  |
|                 | Rt SS1                                                         | MNVFVTSEAAPIYKIGGIGDVCGLPFAIARMGHRVMTIAPRYNFYARIVTVNQEVSEY       | 142-219  |
| Os SS1          | MNVFVSSVAVPMSKIGGIGDVCGLPQALVARGHVMVISPKLYNGSTRAKIGHVEVGF      | 1-78                                                             |          |
| Rt SS1i         | MNVILVAEECAPFCKTGGIGDVGALPKSARRGHRVMTIAPRYEYAEVRRKRYKMEVMYF    | 301-371                                                          |          |
| Os SS1iC        | INILLVAEECAPMSKIGGIGDVGALPKALARRGHRVMTIAPRYEYAEPRRYQMEVIYY     | 258-328                                                          |          |
| Os SS1iA        | MNVIVAAECCSPCKTGGIGDVGALPKALARRGHRVMTIAPRYEYAEIRKRYKLEVKYF     | 319-389                                                          |          |
| Sm SS1iA        | MNVIVAAECCSPCKTGGIGDVGALPKALARRGHRVMTIAPRYEYAEIRKRYKLEVNYP     | 241-311                                                          |          |
| Os SS1iB        | MNVIVAAECCSPCKTGGIGDVGALPKALARRGHRVMTIAPRYEYAEVRRKRYSEVSYF     | 209-273                                                          |          |
| Sm SS1iB        | MNVIVAAECCAPFCKTGGIGDVGALPKALARRGHRVMTIAPRYEYAEVRRKRYSEVSYF    | 207-277                                                          |          |
| Os SS2          | MNVIMVAAECCAPFCKTGGIGDVMQSLPKALARRGHRVMTIAPRYEYAEVRRVYINTVEVGF | 12-82                                                            |          |
| Ec GS           | MQVLHVCSEMFLLIKTGGIGDVIAGLPAQIQEDGVDARVLLPFAFIRRGVYSRRDITLLFG  | 1-72                                                             |          |
| Scs GS1r1079    | MRILFVAEEAPIAKVGMDVGLPKYLRKMGDWRIFLPYFLPDKDFIMKQDFTVH          | 1-71                                                             |          |
| Syn GS03r110945 | MKILFVAEEVPLAKVGMGDMVGLPKVLLQLGHDVRFMPYFVIGDKKEPVMKQQFAVY      | 1-71                                                             |          |
| Os SS1iB        | MHIVHIAVEMAPIAKVGGIGDVTLSRAVQDLGHNVEVILPKRYNPKDLHTRQSTBIKVV    | 778-838                                                          |          |
| Sm SS1iB        | MHIVHIAVEMAPIAKVGGIGDVTLSRAVQDLGHNVEVILPKRYNKNLQIHQSSBINVW     | 122-1296                                                         |          |
| Os SS1iA        | MHIVHIAVEMAPIAKVGGIGDVTLSRAQELGHEVEVILPKRYNKNLHVRQSTBIKVV      | 1105-1175                                                        |          |
| Rt SS1iB        | MHIVHIAVEMAPIAKVGGIGDVTLSRAVQELGHNVEVILPKRYFKVLDLQFNRSSTBIKVV  | 577-647                                                          |          |
| Os SS2b         | LHVCHIAVEMAPIAKVGGIGDVTIAGRAQDMGHLVEVILPKRYVLLGKSEYEHHTIRVY    | 490-571                                                          |          |
| Os SS3A         | LHMSVSTEMAPIAKVGGIGDVTIAGLQVAGKGVVLLPKYLLIEDLKEENGCKNKVY       | 645-715                                                          |          |
| Os SS3C         | LKVHVAVEMAPIAKVSGMGDVVTAARAQEDGQVEVYVPHVNVVDGYSHRAGSETVYQVY    | 225-295                                                          |          |
| Os SS1VA        | LHIVHIAEEMAAPYAKVGGIGDVTAGLQKQTKGHLVEVILPKRYQITNVVIQSYFSSNVW   | 467-542                                                          |          |
| Os SS1VB        | LHIVHIAEEMAAPYAKVGGIGDVTISGLSKAQKKGHLVEVILPKRYQVNVVYQSYFSSNVW  | 426-501                                                          |          |
| Rt SS1Y         | LIVVHIAEEMAAPYAKVGGIGDVTAGLQKQKKGHLVEVILPKRYRVDIVVESIYKKNKIW   | 545-620                                                          |          |
| Os UWE25        | MHIIHIASELAPLAKVGGIGDVTGLCRELSWKGHDVILPKRYQIRDFELSPSEFFNTVW    | 1-76                                                             |          |
| Scs GS1r10031   | MIVQIASECAPVIAKAGGIGDVIIGLSRELEIRGNCVELILPKRYHWGLNLFVPIHCTVY   | 1-76                                                             |          |
| Syn GS03r11393  | MIVQIASECAPVIAKAGGIGDVIIGLSRELEIRGNCVELILPKRYHWGLNLFVPIHCTVY   | 1-76                                                             |          |
| Sc GS           | LHRYCIERRAAHTADVITVYSQIITALEHEHLKRNKFDGILFNGLHEFQKKDKKINRHFHGC | 228-305                                                          |          |

Supplemental Table S5. Amino acid alignment used for phylogenetic analysis of starch synthases (SSs) and glycogen synthases (GSs).  
Continued.

| Family | Isozyme         | Name     | Position |
|--------|-----------------|----------|----------|
| SSY    | SSY             | Os SSY   | 223-230  |
|        |                 | Zm SSY   | 223-233  |
|        |                 | Ms SSY   | 221-246  |
|        | GSs             | Os GSs11 | 133-211  |
|        |                 | Zm GSs11 | 133-211  |
|        |                 | At GSs1  | 133-214  |
|        |                 | Os GSs12 | 133-213  |
|        |                 | Zm GSs1  | 133-217  |
|        |                 | Ot GSs1  | 133-213  |
|        |                 | Os GS1   | 133-217  |
| SS1    | Zm SS1          | 223-233  |          |
|        | At SS1          | 223-233  |          |
|        | Ot SS1          | 133-213  |          |
|        | At SS11         | 323-313  |          |
|        | Os SS11C        | 323-313  |          |
|        | Os SS11A        | 323-313  |          |
|        | Zm SS11A        | 323-313  |          |
|        | Os SS11D        | 223-233  |          |
|        | Zm SS11D        | 223-233  |          |
|        | Ot SS2          | 323-313  |          |
| GS     | Ot GS           | 123-213  |          |
|        | Ncs GSs111079   | 123-133  |          |
|        | Syn GSs3s110945 | 123-133  |          |
|        | Os GS111B       | 123-133  |          |
|        | Zm GS111        | 123-133  |          |
|        | Os GS111A       | 113-123  |          |
|        | At GS111        | 123-133  |          |
|        | Ot GS11B        | 123-133  |          |
|        | Ot GS11C        | 123-133  |          |
|        | Os GS11A        | 123-133  |          |
| SS1Y   | Os SS1Yb        | 323-313  |          |
|        | At SS1Y         | 323-313  |          |
|        | Cp UMS15        | 123-243  |          |
|        | Ncs GSs110091   | 123-243  |          |
|        | Syn GSs3s111333 | 123-243  |          |
|        | Os SS1Ya        | 323-313  |          |
|        | Os SS1Yc        | 323-313  |          |
|        | At SS1Y         | 323-313  |          |
|        | Cp UMS15        | 123-243  |          |
|        | Ncs GSs110091   | 123-243  |          |
| GS1    | Os GS           | 323-313  |          |
|        | Zm GS           | 323-313  |          |
|        | At GS           | 323-313  |          |
|        | Ot GS           | 323-313  |          |
|        | Os GS           | 323-313  |          |
|        | Zm GS           | 323-313  |          |
|        | At GS           | 323-313  |          |
|        | Ot GS           | 323-313  |          |
|        | Os GS           | 323-313  |          |
|        | Zm GS           | 323-313  |          |



**Supplemental Table S5. Amino acid alignment used for phylogenetic analysis of starch synthases (SSs) and glycogen synthases (GSs).  
Continued.**

| Family | Isotype | Name          | Position  |
|--------|---------|---------------|-----------|
| SSV    | SSV     | O2_337        | 380-476   |
|        |         | Sm_337        | 381-477   |
|        |         | Rt_336        | 350-438   |
|        |         | O2_338E1      | 356-355   |
|        |         | Sm_338E1      | 356-355   |
|        |         | Rt_338E1      | 352-358   |
|        | GS3     | O2_338E1      | 353-356   |
|        |         | Sm_338E1      | 353-356   |
|        |         | O2_339E1      | 352-350   |
|        |         | Sm_339E1      | 302-405   |
|        |         | Rt_339E1      | 304-404   |
|        |         | Rt_339E1      | 312-415   |
| SSII   | SSII    | Rt_331        | 173-276   |
|        |         | Rt_332E1      | 465-558   |
|        |         | O2_332E1      | 420-505   |
|        |         | Rt_332E1      | 481-576   |
|        |         | Sm_332E1      | 409-498   |
|        |         | O2_332E2      | 365-450   |
|        | GS5     | Sm_332E2      | 365-464   |
|        |         | O2_332        | 174-270   |
|        |         | Rt_332        | 155-249   |
|        |         | Ncb_68411372  | 146-228   |
|        |         | Sm_6803411024 | 146-230   |
|        |         | O2_332E3      | 312-376   |
| SSIII  | SSIII   | Sm_331E1      | 1377-1434 |
|        |         | O2_331E1      | 1256-1313 |
|        |         | Rt_331E1      | 728-736   |
|        |         | O2_332E       | 655-710   |
|        |         | O2_333A       | 303-360   |
|        |         | O2_333C       | 342-426   |
|        | GS      | O2_331E1      | 626-720   |
|        |         | O2_331E2      | 584-679   |
|        |         | Rt_331E2      | 704-800   |
|        |         | Cp_UME25      | 160-256   |
|        |         | Ncb_684110091 | 160-257   |
|        |         | Sm_6803411133 | 160-257   |
| GS9    | GS9     | Rt_333        | 392-477   |
|        |         | Rt_334        | 392-477   |
|        |         | Rt_335        | 392-477   |
|        |         | Rt_336        | 392-477   |
|        |         | Rt_337        | 392-477   |
|        |         | Rt_338        | 392-477   |
|        | GS10    | Rt_339        | 392-477   |
|        |         | Rt_340        | 392-477   |
|        |         | Rt_341        | 392-477   |
|        |         | Rt_342        | 392-477   |
|        |         | Rt_343        | 392-477   |
|        |         | Rt_344        | 392-477   |

44  
45  
46
